# Supplementary material for: Comprehensive Overview of the Brassinosteroid Biosynthesis Pathways: Substrates, Products, Inhibitors, and Connections
Source: PubMed Central journal article supplement (PMC7358554; doi:10.3389/fpls.2020.01034), 2020-07-07
Supplement: Image_1.pdf [file Image_1.pdf]

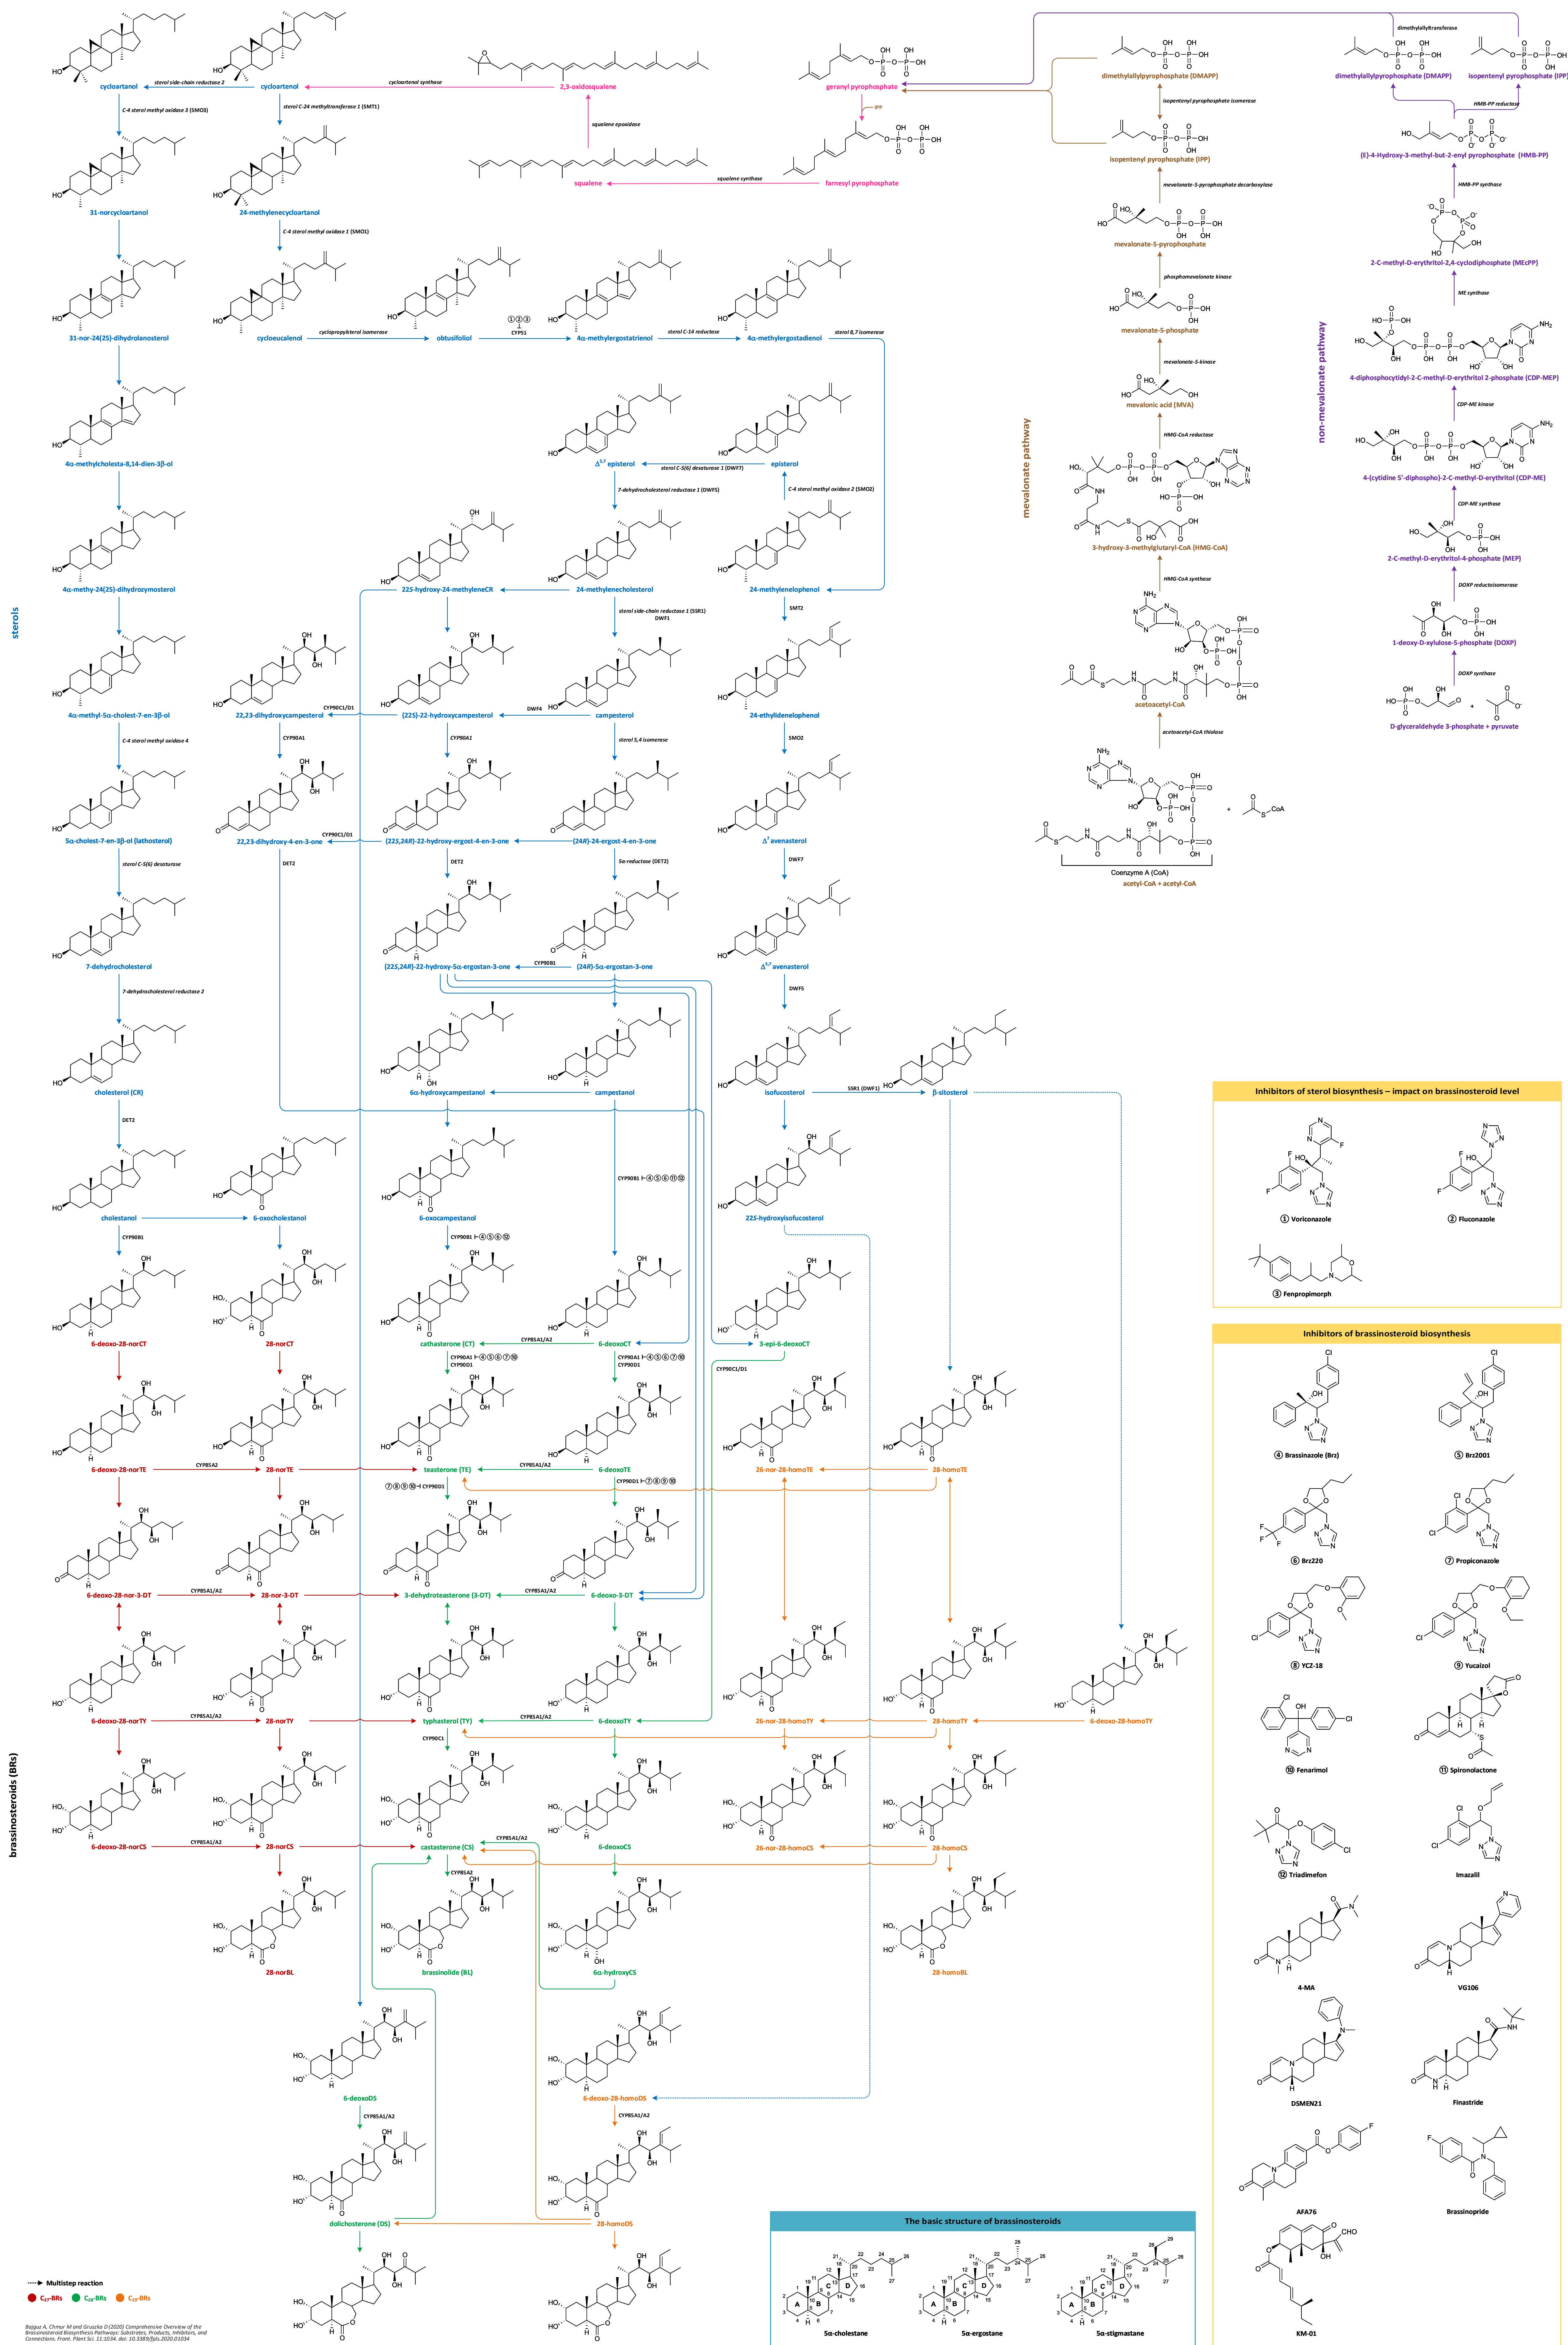

**Inhibitors of sterol biosynthesis – impact on brassinosteroid level**

- Voriconazole
- Fluconazole
- Fenpropimorph

**Inhibitors of brassinosteroid biosynthesis**

- Brassinazole (Brz)
- Brz2001
- Propiconazole
- Yucalzol
- Fenarimol
- Spirodactone
- Triadimefon
- Imazalil
- 4-MA
- VG106
- DMSN21
- Finaftride
- AFA76
- Brassinopride

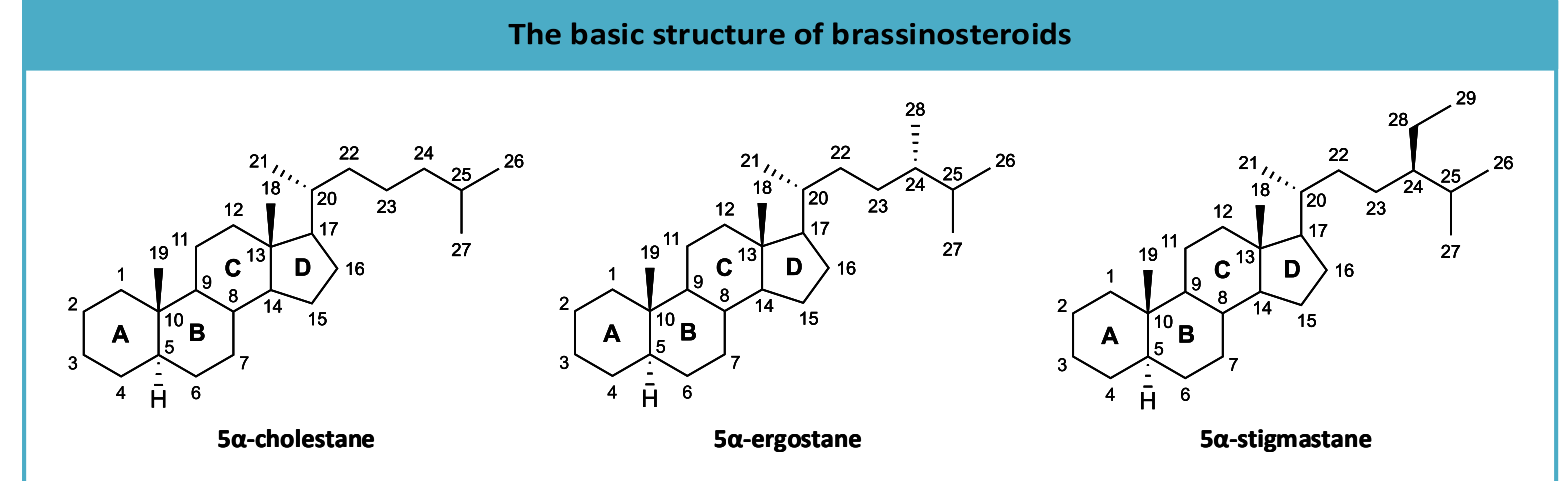

Bojwa A, Chmura M and Grzeszka D (2020) Comprehensive Overview of the Brassinosteroid Biosynthesis Pathways: Substrates, Products, Inhibitors, and Correlators. *Front. Plant Sci.* 11:2034. doi: 10.3389/fpls.2020.02034  
 Licensed under a Creative Commons Attribution 4.0 International License.
